# Supplementary material
Source: PubMed Central journal article supplement (PMC3762603)
Supplement: NIHMS491916-supplement-Supplement1.pdf [file NIHMS491916-supplement-Supplement1.pdf]

## Supplementary Appendix

This appendix has been provided by the authors to give readers additional information about their work.

Supplement to: The National Lung Screening Trial Research Team. Results of initial low-dose computed tomographic screening for lung cancer. *N Engl J Med* 2013;368:1980-91. DOI: [10.1056/NEJMoa1209120](https://doi.org/10.1056/NEJMoa1209120)

## Table of Contents

|                                                        |    |
|--------------------------------------------------------|----|
| Collaborators.....                                     | 3  |
| Writing Team.....                                      | 3  |
| National Lung Screening Trial Research Team.....       | 3  |
| Data and Safety Monitoring Board.....                  | 3  |
| Endpoint Verification Team .....                       | 4  |
| Oversight Committee.....                               | 4  |
| Methods for Estimating Screening Test Parameters ..... | 5  |
| Supplementary Table 1 .....                            | 7  |
| Supplementary Table 2 .....                            | 10 |

## **Collaborators**

### **Writing Team**

Timothy R. Church, Ph.D., University of Minnesota School of Public Health, Minneapolis, MN;  
William C. Black, M.D., Dartmouth–Hitchcock Medical Center, Lebanon, NH; Denise R. Aberle, M.D., University of California at Los Angeles, Los Angeles, CA; Christine D. Berg, M.D., Division of Cancer Prevention, National Cancer Institute, Bethesda, MD; Kathy L. Clingan, Westat, Rockville, MD; Fenghai Duan, Ph.D., American College of Radiology Imaging Network (ACRIN) Biostatistics Center, Brown University, Providence, RI; Richard M. Fagerstrom, Ph.D., Division of Cancer Prevention, National Cancer Institute, Bethesda, MD; Ilana F. Gareen, Ph.D., ACRIN Biostatistics Center, Brown University, Providence, RI; David S. Gierada, M.D., Washington University School of Medicine, St Louis, MO; Gordon C. Jones, M.S., Information Management Systems, Rockville, MD; Irene Mahon, M.P.H., ACRIN Headquarters and Data Management Center, Philadelphia, PA; Pamela M. Marcus, Ph.D., Division of Cancer Prevention, National Cancer Institute, Bethesda, MD; JoRean D. Sicks, M.S., ACRIN Biostatistics Center, Brown University, Providence, RI; Amanda Jain, M.P.H., ACRIN Biostatistics Center, Brown University, Providence, RI; Sarah Baum, M.S., ACRIN Biostatistics Center, Brown University, Providence, RI.

### **National Lung Screening Trial Research Team**

Full list available in supplement at

<http://radiology.rsna.org/content/early/2010/10/28/radiol.10091808.full>

### **Data and Safety Monitoring Board**

The following persons were members of the Data and Safety Monitoring Board: Edward A. Sausville, MD, PhD, (chair), University of Maryland Greenebaum Cancer Center; Wylie Burke, MD, PhD, University of Washington; Gene Colice, MD, Washington Hospital Center; Brenda

Edwards (non-voting member), PhD, Division of Cancer Control and Population Sciences, NCI, NIH; Scott Emerson, MD, PhD, University of Washington; Russell Harris, MD, MPH, University of North Carolina, Chapel Hill; David Johnstone, MD, Medical College of Wisconsin; Jeffrey S. Klein, MD, Fletcher Allen Health Care; Edward L. Korn (non-voting), PhD, Division of Cancer Treatment and Diagnosis, NCI, NIH; Robert Mayer, MD, Dana-Farber Cancer Institute; Joe V. Selby, MD, MPH, Kaiser Permanente Medical Care Program; David W. Sturges, MD, New Ulm, MN; Bruce W. Turnbull, PhD, Cornell University; Thomas J. Watson, MD, Strong Memorial Hospital; John Fletcher, MD†, University of Virginia School of Medicine; Sylvan Green, MD†, former chair, Arizona Cancer Center.

† Deceased.

### **Endpoint Verification Team**

The following persons were members of the End-point Verification Team: Anthony B. Miller, MD, chair, University of Toronto; Martin J. Edelman, MD, University of Maryland Greenebaum Cancer Center; William K. Evans, MD, Juravinski Cancer Centre at Hamilton Health Sciences; Robert S. Fontana, MD, Rochester, MN; Mitchell Machtay, MD, Jefferson Medical College.

### **Oversight Committee**

The following persons were members of the NLST Oversight Committee: Robert C. Young, MD, chair, Fox Chase Cancer Center; David Alberts, MD, Arizona Cancer Center; David DeMets, PhD, University of Wisconsin Medical School; Peter Greenwald, MD, PhD, Division of Cancer Prevention, NCI, NIH; Paula Jacobs, MD, Division of Cancer Treatment and Diagnosis, NCI, NIH; Theresa C. McLoud, MD, Massachusetts General Hospital; David P. Naidich, MD, New York University Medical School; James Tatum, MD, Division of Cancer Treatment and Diagnosis, NCI, NIH.

## **Methods for Estimating Screening Test Parameters**

For each dichotomized (positive vs. negative) screening result, whether lung cancer was present or not at the time of the screen was defined as follows. A screen was classified as having been done in the presence of lung cancer if a lung cancer diagnosis was documented for the participant during the period from the screen to either the next screen or one year later, whichever came first or, for positive screens, if a lung cancer diagnosis was documented after a longer period during which the participant had no further screening but a sequence of diagnostic procedures prompted by the screen and having no time gap between consecutive procedures greater than a year. A screen was classified as having been done in the absence of lung cancer if it was not classified as having been done in the presence of lung cancer and at least one of the following criteria was satisfied: (1) the participant had a subsequent screen, (2) the participant received at least one screen-prompted diagnostic procedure (clinical evaluation at a minimum), (3) the participant died and the death was certified by the NLST Endpoint Verification Process without documentation of a diagnosis of lung cancer, (4) the participant responded to a survey at least 300 days after the screen and reported that lung cancer had not been diagnosed, (5) the participant had a documented diagnosis of lung cancer more than one year after the screen. Screening results that could not be categorized as above were classified as having an unknown lung cancer status.

Subjects with missing and non-diagnostic T0 screens and those having screening results with unknown lung cancer status were excluded from screening accuracy calculations. Sensitivity was estimated as the ratio of the number of true positive screens (positive screens in the presence of lung cancer) to the sum of the numbers of true positive and false negative screens (negative screens in the presence of lung cancer). Specificity was estimated as the ratio of the number of true negative screens (negative screens in the absence of lung cancer) to the sum of the numbers

of true negative and false positive screens (positive screens in the absence of lung cancer). The numbers of positive screens and true positive screens were directly obtained from the tables. The number of false positive results was determined by subtracting the number of true positive results from the number of positive results, while the number of false negative results was determined by subtracting the number of true positive results from the number of lung cancer cases. The number of true negative results was determined by subtracting the number of false negative results from the number of negative results. The positive predictive value (PPV) of various findings was estimated by the ratio of true positive to all positives. The negative predictive value (NPV) was estimated by the ratio of true negatives to all negatives.

**Supplementary Table 1: Sex, age, race/ethnicity, smoking history, and education by study arm and T0 screening result**

|                                           | Study Arm                                 |            |       |            |      |                                           |            |       |            |      |
|-------------------------------------------|-------------------------------------------|------------|-------|------------|------|-------------------------------------------|------------|-------|------------|------|
|                                           | LDCT                                      |            |       |            |      | CXR                                       |            |       |            |      |
|                                           | #<br>Randomized/eligible<br>for screening | # Screened |       | # Positive |      | #<br>Randomized/eligible<br>for screening | # Screened |       | # Positive |      |
|                                           |                                           | N          | %     | N          | %    |                                           | N          | %     | N          | %    |
| All                                       | 26715                                     | 26309      | 98.5  | 7191       | 27.3 | 26724                                     | 26035      | 97.4  | 2387       | 9.2  |
| Sex                                       |                                           |            |       |            |      |                                           |            |       |            |      |
| Male                                      | 15765                                     | 15539      | 98.6  | 4194       | 27.0 | 15758                                     | 15400      | 97.7  | 1504       | 9.8  |
| Female                                    | 10950                                     | 10770      | 98.4  | 2997       | 27.8 | 10966                                     | 10635      | 97.0  | 883        | 8.3  |
| Age(years)                                |                                           |            |       |            |      |                                           |            |       |            |      |
| < 55 <sup>1</sup>                         | 2                                         | 2          | 100.0 | 1          | 50.0 | 4                                         | 4          | 100.0 | 0          | 0.0  |
| 55-59                                     | 11436                                     | 11245      | 98.3  | 2730       | 24.3 | 11417                                     | 11103      | 97.2  | 870        | 7.8  |
| 60-64                                     | 8168                                      | 8059       | 98.7  | 2217       | 27.5 | 8196                                      | 7975       | 97.3  | 747        | 9.4  |
| 65-69                                     | 4755                                      | 4689       | 98.6  | 1456       | 31.1 | 4760                                      | 4661       | 97.9  | 480        | 10.3 |
| 70-74                                     | 2353                                      | 2313       | 98.3  | 787        | 34.0 | 2344                                      | 2289       | 97.7  | 289        | 12.6 |
| >=75 <sup>1</sup>                         | 1                                         | 1          | 100.0 | 0          | 0.0  | 3                                         | 3          | 100.0 | 1          | 33.3 |
| Race                                      |                                           |            |       |            |      |                                           |            |       |            |      |
| White                                     | 24284                                     | 24001      | 98.8  | 6707       | 27.9 | 24255                                     | 23748      | 97.9  | 2177       | 9.2  |
| Black or African-American                 | 1195                                      | 1167       | 97.7  | 226        | 19.4 | 1180                                      | 1148       | 97.3  | 119        | 10.4 |
| Asian                                     | 559                                       | 546        | 97.7  | 123        | 22.5 | 536                                       | 523        | 97.6  | 42         | 8.0  |
| American Indian or Alaskan Native         | 92                                        | 89         | 96.7  | 21         | 23.6 | 98                                        | 94         | 95.9  | 8          | 8.5  |
| Native Hawaiian or Other Pacific Islander | 91                                        | 84         | 92.3  | 16         | 19.0 | 102                                       | 93         | 91.2  | 5          | 5.4  |
| More than one race                        | 332                                       | 326        | 98.2  | 83         | 25.5 | 346                                       | 334        | 96.5  | 27         | 8.1  |
| Participant refused to answer             | 57                                        | 50         | 87.7  | 6          | 12.0 | 52                                        | 49         | 94.2  | 3          | 6.1  |
| Unknown                                   | 105                                       | 46         | 43.8  | 9          | 19.6 | 155                                       | 46         | 29.7  | 6          | 13.0 |
| Ethnicity                                 | 479                                       | 464        | 96.9  | 109        | 23.5 | 456                                       | 443        | 97.1  | 35         | 7.9  |

|                                                                    |                   | Study Arm                                 |            |       |            |      |                                           |            |       |            |      |
|--------------------------------------------------------------------|-------------------|-------------------------------------------|------------|-------|------------|------|-------------------------------------------|------------|-------|------------|------|
|                                                                    |                   | LDCT                                      |            |       |            |      | CXR                                       |            |       |            |      |
|                                                                    |                   | #<br>Randomized/eligible<br>for screening | # Screened |       | # Positive |      | #<br>Randomized/eligible<br>for screening | # Screened |       | # Positive |      |
|                                                                    |                   |                                           | N          | %     | N          | %    |                                           | N          | %     | N          | %    |
| <b>Hispanic or Latino</b>                                          |                   |                                           |            |       |            |      |                                           |            |       |            |      |
| <b>Neither Hispanic nor Latino</b>                                 |                   | 26073                                     | 25741      | 98.7  | 7040       | 27.3 | 26033                                     | 25470      | 97.8  | 2339       | 9.2  |
| <b>Participant refused to answer</b>                               |                   | 5                                         | 5          | 100.0 | 2          | 40.0 | 1                                         | 1          | 100.0 | 0          | 0.0  |
| <b>Unknown</b>                                                     |                   | 158                                       | 99         | 62.7  | 40         | 40.4 | 234                                       | 121        | 51.7  | 13         | 10.7 |
| <b>Smoking status<sup>2</sup></b>                                  | <b>Pack years</b> |                                           |            |       |            |      |                                           |            |       |            |      |
| <b>Former</b>                                                      | <b>0-29.99</b>    | 4                                         | 4          | 100.0 | 0          | 0.0  | 11                                        | 11         | 100.0 | 0          | 0.0  |
|                                                                    | <b>30-34.99</b>   | 1824                                      | 1798       | 98.6  | 433        | 24.1 | 1905                                      | 1859       | 97.6  | 140        | 7.5  |
|                                                                    | <b>35-39.99</b>   | 2043                                      | 2010       | 98.4  | 518        | 25.8 | 1966                                      | 1926       | 98.0  | 172        | 8.9  |
|                                                                    | <b>40-44.99</b>   | 1813                                      | 1802       | 99.4  | 491        | 27.2 | 1761                                      | 1728       | 98.1  | 162        | 9.4  |
|                                                                    | <b>45-49.99</b>   | 1423                                      | 1407       | 98.9  | 394        | 28.0 | 1354                                      | 1325       | 97.9  | 122        | 9.2  |
|                                                                    | <b>50+</b>        | 6749                                      | 6645       | 98.5  | 1791       | 27.0 | 6832                                      | 6666       | 97.6  | 608        | 9.1  |
|                                                                    | <b>Total</b>      | 13856                                     | 13666      | 98.6  | 3627       | 26.5 | 13829                                     | 13515      | 97.7  | 1204       | 8.9  |
| <b>Current</b>                                                     | <b>Pack years</b> |                                           |            |       |            |      |                                           |            |       |            |      |
|                                                                    | <b>0-29.99</b>    | 2                                         | 2          | 100.0 | 0          | 0.0  | 4                                         | 4          | 100.0 | 1          | 25.0 |
|                                                                    | <b>30-34.99</b>   | 1099                                      | 1081       | 98.4  | 251        | 23.2 | 1152                                      | 1117       | 97.0  | 93         | 8.3  |
|                                                                    | <b>35-39.99</b>   | 1859                                      | 1834       | 98.7  | 453        | 24.7 | 1869                                      | 1820       | 97.4  | 131        | 7.2  |
|                                                                    | <b>40-44.99</b>   | 2394                                      | 2353       | 98.3  | 646        | 27.5 | 2304                                      | 2232       | 96.9  | 200        | 9.0  |
|                                                                    | <b>45-49.99</b>   | 1549                                      | 1523       | 98.3  | 444        | 29.2 | 1585                                      | 1534       | 96.8  | 172        | 11.2 |
|                                                                    | <b>50+</b>        | 5956                                      | 5850       | 98.2  | 1770       | 30.3 | 5981                                      | 5813       | 97.2  | 586        | 10.1 |
|                                                                    | <b>Total</b>      | 12859                                     | 12643      | 98.3  | 3564       | 28.2 | 12895                                     | 12520      | 97.1  | 1183       | 9.4  |
| <b>Education level</b>                                             |                   |                                           |            |       |            |      |                                           |            |       |            |      |
| <b>Less than HS degree</b>                                         |                   | 1641                                      | 1615       | 98.4  | 472        | 29.2 | 1607                                      | 1563       | 97.3  | 167        | 10.7 |
| <b>High school graduate/GED</b>                                    |                   | 6272                                      | 6174       | 98.4  | 1827       | 29.6 | 6436                                      | 6300       | 97.9  | 599        | 9.5  |
| <b>Post high school training, Associate's degree/ some college</b> |                   | 9920                                      | 9803       | 98.8  | 2624       | 26.8 | 9786                                      | 9534       | 97.4  | 846        | 8.9  |
| <b>Bachelor's degree</b>                                           |                   | 4504                                      | 4448       | 98.8  | 1156       | 26.0 | 4441                                      | 4367       | 98.3  | 372        | 8.5  |



|                         | Study Arm                                 |             |             |            |             |                                           |             |             |            |            |
|-------------------------|-------------------------------------------|-------------|-------------|------------|-------------|-------------------------------------------|-------------|-------------|------------|------------|
|                         | LDCT                                      |             |             |            |             | CXR                                       |             |             |            |            |
|                         | #<br>Randomized/eligible<br>for screening | # Screened  |             | # Positive |             | #<br>Randomized/eligible<br>for screening | # Screened  |             | # Positive |            |
|                         |                                           | N           | %           | N          | %           |                                           | N           | %           | N          | %          |
| <b>Graduate school</b>  | <b>3779</b>                               | <b>3742</b> | <b>99.0</b> | <b>974</b> | <b>26.0</b> | <b>3820</b>                               | <b>3767</b> | <b>98.6</b> | <b>356</b> | <b>9.5</b> |
| <b>Other or unknown</b> | <b>599</b>                                | <b>527</b>  | <b>88.0</b> | <b>138</b> | <b>26.2</b> | <b>634</b>                                | <b>504</b>  | <b>79.5</b> | <b>47</b>  | <b>9.3</b> |

<sup>1</sup>Ineligible but included in analysis

<sup>2</sup>Broken down by pack-year range. Former: reported having quit at baseline; Current: reported smoking at baseline

**Supplementary Table 2: First-line treatment<sup>1</sup> procedures by randomization arm and stage of cancer<sup>2</sup>**

| First-line treatment |                                        | Stage |      |       |      |       |      |       |      |       |      |       |      |       |      |         |      | Total |      |
|----------------------|----------------------------------------|-------|------|-------|------|-------|------|-------|------|-------|------|-------|------|-------|------|---------|------|-------|------|
|                      |                                        | IA    |      | IB    |      | IIA   |      | IIB   |      | IIIA  |      | IIIB  |      | IV    |      | Unknown |      |       |      |
|                      |                                        | N     | %    | N     | %    | N     | %    | N     | %    | N     | %    | N     | %    | N     | %    | N       | %    | N     | %    |
| LDCT                 | Surgery only                           | 117   | 88.6 | 20    | 76.9 | 3     | 30.0 | 3     | 25.0 | 2     | 5.9  | 2     | 6.7  | 0     | 0.0  | 2       | 50.0 | 149   | 51.0 |
|                      | Surgery and chemotherapy               | 8     | 6.1  | 4     | 15.4 | 3     | 30.0 | 3     | 25.0 | 2     | 5.9  | 4     | 13.3 | 3     | 6.8  | 0       | 0.0  | 27    | 9.2  |
|                      | Surgery and radiotherapy               | 0     | 0.0  | 0     | 0.0  | 2     | 20.0 | 2     | 16.7 | 2     | 5.9  | 3     | 10.0 | 2     | 4.5  | 0       | 0.0  | 11    | 3.8  |
|                      | Surgery, chemotherapy and radiotherapy | 2     | 1.5  | 1     | 3.8  | 0     | 0.0  | 1     | 8.3  | 9     | 26.5 | 2     | 6.7  | 0     | 0.0  | 0       | 0.0  | 15    | 5.1  |
|                      | Chemotherapy only                      | 0     | 0.0  | 0     | 0.0  | 2     | 20.0 | 0     | 0.0  | 1     | 2.9  | 1     | 3.3  | 19    | 43.2 | 0       | 0.0  | 23    | 7.9  |
|                      | Chemotherapy and radiotherapy          | 0     | 0.0  | 0     | 0.0  | 0     | 0.0  | 1     | 8.3  | 13    | 38.2 | 15    | 50.0 | 12    | 27.3 | 0       | 0.0  | 41    | 14.0 |
|                      | Radiotherapy only                      | 3     | 2.3  | 0     | 0.0  | 0     | 0.0  | 0     | 0.0  | 4     | 11.8 | 1     | 3.3  | 2     | 4.5  | 1       | 25.0 | 11    | 3.8  |
|                      | Other treatment                        | 0     | 0.0  | 0     | 0.0  | 0     | 0.0  | 1     | 8.3  | 0     | 0.0  | 0     | 0.0  | 2     | 4.5  | 0       | 0.0  | 3     | 1.0  |
|                      | No treatment <sup>2</sup>              | 2     | 1.5  | 1     | 3.8  | 0     | 0.0  | 1     | 8.3  | 0     | 0.0  | 2     | 6.7  | 4     | 9.1  | 0       | 0.0  | 10    | 3.4  |
|                      | Treatment data incomplete              | 0     | 0.0  | 0     | 0.0  | 0     | 0.0  | 0     | 0.0  | 1     | 2.9  | 0     | 0.0  | 0     | 0.0  | 1       | 25.0 | 2     | 0.7  |
| <b>Total</b>         | 132                                    | 100.0 | 26   | 100.0 | 10   | 100.0 | 12   | 100.0 | 34   | 100.0 | 30   | 100.0 | 44   | 100.0 | 4    | 100.0   | 292  | 100.0 |      |
| CXR                  | Surgery only                           | 40    | 87.0 | 17    | 70.8 | 1     | 33.3 | 3     | 30.0 | 2     | 6.9  | 4     | 14.8 | 1     | 2.2  | 1       | 20.0 | 69    | 36.3 |
|                      | Surgery and chemotherapy               | 2     | 4.3  | 5     | 20.8 | 1     | 33.3 | 6     | 60.0 | 6     | 20.7 | 4     | 14.8 | 2     | 4.3  | 0       | 0.0  | 26    | 13.7 |
|                      | Surgery and radiotherapy               | 1     | 2.2  | 0     | 0.0  | 0     | 0.0  | 0     | 0.0  | 2     | 6.9  | 1     | 3.7  | 0     | 0.0  | 1       | 20.0 | 5     | 2.6  |
|                      | Surgery, chemotherapy and radiotherapy | 1     | 2.2  | 0     | 0.0  | 1     | 33.3 | 0     | 0.0  | 5     | 17.2 | 2     | 7.4  | 3     | 6.5  | 0       | 0.0  | 12    | 6.3  |
|                      | Chemotherapy only                      | 0     | 0.0  | 0     | 0.0  | 0     | 0.0  | 0     | 0.0  | 0     | 0.0  | 2     | 7.4  | 23    | 50.0 | 1       | 20.0 | 26    | 13.7 |
|                      | Chemotherapy and radiotherapy          | 0     | 0.0  | 1     | 4.2  | 0     | 0.0  | 1     | 10.0 | 11    | 37.9 | 10    | 37.0 | 11    | 23.9 | 1       | 20.0 | 35    | 18.4 |
|                      | Radiotherapy only                      | 2     | 4.3  | 0     | 0.0  | 0     | 0.0  | 0     | 0.0  | 2     | 6.9  | 2     | 7.4  | 2     | 4.3  | 0       | 0.0  | 8     | 4.2  |
|                      | Other treatment                        | 0     | 0.0  | 0     | 0.0  | 0     | 0.0  | 0     | 0.0  | 1     | 3.4  | 0     | 0.0  | 1     | 2.2  | 0       | 0.0  | 2     | 1.1  |
|                      | No treatment <sup>2</sup>              | 0     | 0.0  | 1     | 4.2  | 0     | 0.0  | 0     | 0.0  | 0     | 0.0  | 1     | 3.7  | 3     | 6.5  | 1       | 20.0 | 6     | 3.2  |
|                      | Treatment data incomplete              | 0     | 0.0  | 0     | 0.0  | 0     | 0.0  | 0     | 0.0  | 0     | 0.0  | 1     | 3.7  | 0     | 0.0  | 0       | 0.0  | 1     | 0.5  |
| <b>Total</b>         | 46                                     | 100.0 | 24   | 100.0 | 3    | 100.0 | 10   | 100.0 | 29   | 100.0 | 27   | 100.0 | 46   | 100.0 | 5    | 100.0   | 190  | 100.0 |      |

<sup>1</sup>Table includes first-line treatments that occurred within 6 months of diagnosis.

<sup>2</sup>“No treatment” includes subjects who received no treatment at all or who received first-line treatment after the 6 months following diagnosis.
